1           **Longitudinal monitoring of disease burden and response using ctDNA from**  
2 **dried blood spots in xenograft models**

3

4 Carolin M Sauer<sup>1,2#\*</sup>, Katrin Heider<sup>1,2#</sup>, Jelena Belic<sup>1,2</sup>, Samantha E Boyle<sup>1,2</sup>, James A Hall<sup>1,2</sup>,  
5 Dominique-Laurent Couturier<sup>1,3</sup>, Angela An<sup>1,2</sup>, Aadhitthya Vijayaraghavan<sup>1,2</sup>, Marika AV Reinius<sup>1,2</sup>,  
6 Karen Hosking<sup>2</sup>, Maria Vias<sup>1,2</sup>, Nitzan Rosenfeld<sup>1,2\$\*</sup>, James D Brenton<sup>1,2,4,5\$\*</sup>

7

8

9

10 1. Cancer Research UK Cambridge Institute, University of Cambridge, Cambridge CB2 0RE, UK.

11

12 2. Cancer Research UK Major Centre–Cambridge, University of Cambridge, Cambridge CB2 0RE,  
13 UK.

14

15 3. Medical Research Council Biostatistics Unit, University of Cambridge, Cambridge CB2 0SR, UK.

16

17 4. Cambridge University Hospital NHS Foundation Trust and National Institute for Health Research  
18 Cambridge Biomedical Research Centre, Addenbrooke's Hospital, Cambridge, UK.

19

20 5. Department of Oncology, University of Cambridge, Cambridge CB2 0XZ, UK.

21

22

23

24 # These authors contributed equally to this work as co-first authors.

25 \$ These authors contributed equally to this work as co-senior authors.

26 \* Correspondence: [carolin.sauer@cruk.cam.ac.uk](mailto:carolin.sauer@cruk.cam.ac.uk); [nitzan.rosenfeld@cruk.cam.ac.uk](mailto:nitzan.rosenfeld@cruk.cam.ac.uk);

27 [james.brenton@cruk.cam.ac.uk](mailto:james.brenton@cruk.cam.ac.uk).

28           **Abstract**

29   Whole genome sequencing (WGS) of circulating tumour DNA (ctDNA) is now a clinically important  
30   biomarker for predicting therapy response, disease burden and disease progression. However, the  
31   translation of ctDNA monitoring into vital pre-clinical PDX models has not been possible owing to low  
32   circulating blood volumes in small rodents. Here, we describe the longitudinal detection and  
33   monitoring of ctDNA from minute volumes of blood in PDX mice. We developed a xenograft Tumour  
34   Fraction (xTF) metric using shallow WGS of dried blood spots (DBS), and demonstrate its application  
35   to quantify disease burden, monitor treatment response and predict disease outcome in a pre-clinical  
36   study of PDX mice. Further, we show how our DBS-based ctDNA assay can be used to detect gene-  
37   specific copy number changes and examine the copy number landscape over time. Use of sequential  
38   DBS ctDNA assays will transform future trial designs in both mice and patients.

39

40           **Main**

41           ***Introduction***

42   Liquid biopsies are routinely used in the clinic to sensitively detect and quantify disease burden, and  
43   have critical roles for therapeutic decision making in precision medicine<sup>1-6</sup>. Plasma circulating tumour  
44   DNA (ctDNA) is the most widely studied circulating analyte for disease monitoring and molecular  
45   genotyping of tumours<sup>2,7</sup>. Technical advances in next generation sequencing (NGS) now achieve  
46   unprecedented sensitivities for the detection of ctDNA using 6–10ml of whole blood<sup>1,8</sup>. To enable very  
47   accurate monitoring of disease burden and progression, several whole genome sequencing (WGS)-  
48   based strategies have been developed detecting combinations of single-nucleotide variants, small  
49   insertions/deletions and somatic copy number aberrations (SCNAs)<sup>9-14</sup>. In addition, deriving other  
50   biochemical features of ctDNA from WGS, including fragment size and chromosome accessibility, can  
51   further enhance detection sensitivity and infer biological information about tumour site of origin<sup>15-19</sup>.

52           Modelling therapeutic response in mice bearing patient-derived xenografts (PDX) is a critical  
53   step to test treatment regimens and pharmacogenomics during drug development<sup>20,21</sup>. However,  
54   WGS-based ctDNA assays cannot be used in small rodents as the circulating blood volume of a  
55   mouse is only ~1.5–2.5ml. Consequently, detailed ctDNA assays can only be obtained from terminal  
56   bleeding of mice, preventing longitudinal analyses and more efficient therapeutic study designs.  
57   Manual measurements of tumour volumes in subcutaneous models are the commonest surrogate to

58 estimate treatment response and disease burden<sup>22,23</sup>. These measures are often poorly reproducible  
59 and can be biased by treatment-induced tissue necrosis and oedema. Using imaging as an alternative  
60 to estimate response in PDXs is more time-consuming, requires general anaesthesia and may also  
61 need the introduction of *in-vivo* reporter genes<sup>24,25</sup>.

62 Therefore, bringing WGS-based ctDNA assays into mice would have two major benefits:  
63 firstly, more efficient and accurate serial measurements across multiple animals, and secondly the  
64 direct translation of biological and biochemical observations from mouse ctDNA studies into patient  
65 studies and vice versa. We recently illustrated the detection of ctDNA in dried blood spots (DBS) from  
66 minute volumes of whole blood using a size selection approach to enrich for cell free DNA (cfDNA)<sup>26</sup>.  
67 Using a modified approach in PDX mice, we now demonstrate that shallow WGS (sWGS) of DBS  
68 from 50µl of whole blood can be used for serial ctDNA measurements, longitudinal disease monitoring  
69 and copy number analyses in pre-clinical studies. The work presented here provides important proof-  
70 of-principle data and further supports the application and feasibility of DBS-based ctDNA sampling  
71 both in pre-clinical and clinical studies.

72

### 73 ***Development and validation of the xTF metric from DBS***

74 To detect and accurately quantify ctDNA from minute volumes of blood in pre-clinical PDX studies, we  
75 developed a xenograft Tumour Fraction (xTF) metric, which is estimated from shallow whole genome  
76 sequencing (sWGS) of DBS samples (**Fig. 1a**). Briefly, 50µl of blood are collected from the tail vein,  
77 deposited onto a filter card and left to air-dry. DNA is extracted, contaminating genomic DNA is  
78 removed<sup>26</sup> and subsequently sequenced at low coverage following library preparation. Human- and  
79 mouse-specific reads are identified using Xenomapper<sup>27</sup>, and the xTF is calculated as the ratio of  
80 human-specific reads divided by total reads (human and mouse specific reads) per sample (**see**  
81 **Methods**).

82 To test both the specificity and sensitivity of the xTF metric, we established a pre-clinical  
83 study using PDX mice derived from four high grade serous ovarian cancer (HGSOC) patients (see  
84 next section). We collected a total of 10 DBS samples from 5 healthy non-tumour bearing mice and  
85 91 DBS samples from 35 tumour bearing PDX mice. Reads from healthy control mice showed <0.1%  
86 assignment as human-specific sequences (false-positive background). In addition, healthy control  
87 mice had significantly lower xTF values compared to tumour-bearing PDX mice, independent of

88 tumour size and disease burden, indicating the high specificity of the xTF metric (Welch t-test,  $P =$   
89  $2.2 \times 10^{-16}$ , **Fig. 1b**). To confirm the linearity and sensitivity of our approach, we prepared an *in silico* 7-  
90 point dilution series (**see Methods**) by combining sequencing reads from a healthy mouse DBS and  
91 DBS samples collected from five independent ovarian cancer patients at different ratios. We were  
92 able to accurately detect human reads for all seven dilution points, and observed a strong correlation  
93 between measured xTFs and spiked-in human reads at human:mouse proportions of 1–25%  
94 (Spearman's  $R = 0.99$ ,  $P < 2.2 \times 10^{-16}$ , **Fig. 1c**)

95       Next, we examined the fragment size distributions of human- and mouse-specific reads from  
96 sWGS of DBS samples. In human plasma samples, ctDNA has a modal size of approximately 145bp,  
97 which is shorter than cfDNA with a prominent mode of approximately 165bp<sup>15,28</sup>. These fragment size  
98 properties were recapitulated in the human- and mouse-specific reads from DBS samples (**Fig. 1d**).  
99 Given the high specificity and sensitivity of our approach, we were able to derive absolute copy  
100 number (ACN) data from as little as 500,000 human-specific DBS reads using QDNAseq<sup>29</sup> followed  
101 by Rascal<sup>30</sup> (**Fig. 1e**). The observed absolute somatic copy number aberrations (SCNAs) (**Fig. 1f**) and  
102 their extent were strongly correlated with sWGS of PDX tumour tissues from the same patient  
103 (**Supplementary Fig. 1 and 2a-d**). Unsurprisingly, the ability to accurately detect SCNAs in DBS  
104 strongly correlated with increasing xTF values (**Fig. 1g**). No correlations were observed when  
105 comparing blood spot ACN profiles from healthy non-tumour bearing mice to any of the four patient  
106 tumour tissues (**Supplementary Fig. 2e-g**). Using the definitions of copy number gains and losses  
107 outlined by the Catalogue of Somatic Mutations In Cancer (COSMIC), amplifications of driver SCNAs  
108 were detectable in blood spot samples with xTFs ranging from 0.6–54.4% (**Supplementary Fig. 1**  
109 **and 2h**).

110

### 111       ***The xTF allows accurate monitoring of disease progression***

112 We next investigated whether the DBS-based xTF assay could be used for longitudinal monitoring of  
113 disease progression and treatment response. An overview of our pre-clinical PDX study is shown in  
114 **Fig. 2a**. The PDX models were selected from 4 patients with different clinical responses to platinum-  
115 based chemotherapy and distinct copy number signatures<sup>31</sup> for homologous recombination deficiency  
116 (HRD) that are predictive of sensitivity to carboplatin (**Supplementary Fig. 3 and 4**). All PDXs were  
117 derived from tumour samples prior to systemic therapy and histological and molecular features were

118 shown to be highly similar to the primary tumour (**Supplementary Fig. 5 and 6**). PDX mice were  
119 treated with either 50mg/kg carboplatin or control on day 1 and 8. Tumour volumes were measured  
120 weekly, and blood spots were collected on day 1 (prior to treatment start), day 16 and 29 (**Fig. 2a**).

121 We observed a progressive increase in xTF in all 17 untreated PDX control mice. In contrast,  
122 the 18 mice that were treated with carboplatin showed variable decreases in xTF detected in DBS  
123 samples collected at day 16 and 29 in comparison to pre-treatment (day 1) samples (**Fig. 2b**).  
124 Similarly, the fraction of samples in which we were able to detect human gene-level amplifications (i.e.  
125 *MYC* and *MCM10* amplifications in patients 828 and 771, respectively) from DBS reads increased in  
126 untreated and decreased in carboplatin-treated mice over time (**Fig. 2c**). When correlating xTF values  
127 to tumour volumes obtained from weekly tumour measurements, we found that xTFs increased with  
128 increasing tumour volumes and thus disease burden in untreated control mice (Pearson's  $R = 0.45$ ,  $P$   
129  $= 0.00018$ , **Fig. 2d**). However, no correlation was found in treated samples (Pearson's  $R = 0.056$ ,  $P =$   
130  $0.78$ , **Fig. 2d**), likely because of treatment-induced tissue necrosis and oedema biasing tumour  
131 volume measures.

132

### 133 ***The xTF rate of change is predictive of disease outcome***

134 Early dynamic change in ctDNA can predict progression-free survival and provide real-time  
135 assessment of treatment efficacy<sup>32</sup>. Similar predictive measures in mice could also improve the  
136 efficiency of PDX study designs. All four PDX lines in our cohort were from patients with platinum-  
137 sensitive disease, and PDX 828 and 831 were predicted to have the best response to carboplatin  
138 treatment owing to somatic and germline *BRCA1* mutations, respectively (**Supplementary Fig. 3 and**  
139 **7**). PDX 600 and 771 had less marked HRD signatures (**Supplementary Fig. 4 and 7**). Clinical  
140 progression free survival (PFS) and overall survival (OS) (**Supplementary Fig. 7**) could not be used  
141 as response predictors as the four patients have important differences in prognostic variables for  
142 stage and residual disease after surgery (**Supplementary Fig. 3**).

143 We asked whether the rate of change in xTFs during the first 30 days following initiation of  
144 treatment was predictive of disease outcome in our PDX cohort. Given the poor correlation between  
145 xTFs and tumour volumes (**Fig. 2d**), we explored tumour growth kinetics from weekly tumour  
146 measurements taken from the time of tumour engraftment until study endpoint for carboplatin-treated  
147 and untreated mice (**see Methods, Fig. 3a-d**). Tumour volumes and growth rates were not

148 significantly different between treatment and control mice across the four lines prior to start of  
149 treatment (**Supplementary Table 1**). Importantly, the rates of tumour regrowth in treated mice were  
150 not significantly different from initial growth rates after engrafting and prior to treatment start  
151 (**Supplementary Table 1**), providing evidence that carboplatin treatment (and potential clonal  
152 selection) did not change tumour growth kinetics. We then inferred inflection points representing  
153 treatment-induced changes in tumour growth rates, allowing estimation of both the time of treatment  
154 response ( $t_1$ ) and time of tumour regrowth ( $t_2$ ) (**Fig. 3a-d**).  $t_2-t_1$  therefore represents the duration of  
155 treatment effect, and  $t_2$  is comparable to PFS, the commonest clinically validated surrogate endpoint  
156 for clinical trials. As predicted,  $t_2-t_1$  measures were longest (best response) for PDX 828 and 831 and  
157 the worst response was seen in PDX 600.

158 Importantly, there was a strong negative correlation between xTF change rate (**Fig. 2b**)  
159 during the first 30 days of treatment and  $t_2$  (tumour regrowth; Pearson's  $R = -0.97$ ,  $P = 0.025$ ). xTF  
160 was also strongly correlated with study endpoint (a surrogate for overall survival; Pearson's  $R =$   
161  $-0.73$ ,  $P = 0.039$ ) (**Fig. 3e**).

162

### 163 **Discussion**

164 We here demonstrate for the first time how minimally-invasive sampling of DBS can be used to  
165 accurately monitor disease progression and treatment response in PDX mice using sWGS of ctDNA.  
166 The low volume of blood required allows repeated serial collection of ctDNA samples from living, non-  
167 anaesthetized mice and removes the need for terminal bleeding. Further, detailed modelling of tumour  
168 response indicates that the initial change in xTF in response to treatment is predictive of PFS and OS.  
169 This advocates the use of the xTF metric as a reliable minimally-invasive tool to monitor disease  
170 progression and to study treatment response in pre-clinical settings.

171 DBS are derived from whole blood; sensitive detection of ctDNA from DBS therefore requires  
172 removal of contaminating genomic DNA which otherwise significantly dilutes ctDNA signal<sup>26</sup>. In  
173 comparison to plasma samples, however, DBS have clear sampling advantages, since they do not  
174 require prompt centrifugation, and provide stable and space-efficient storage of DNA for many  
175 years<sup>33</sup>. DBS therefore have the potential to simplify sample collection and revolutionise study  
176 designs in both mice and patients:

177           In mice, the use of DBS has already been illustrated in pharmacokinetic studies<sup>38</sup> and has  
178 proven to conform with the 3Rs of animal welfare<sup>39</sup> by reducing the number of animals required per  
179 study, allowing facile sample collection at multiple timepoints, and improving the quality and quantity  
180 of data collected from a given mouse. In this study, blood samples were collected from the tail vein,  
181 which is considered a simple, humane and anaesthesia-free approach<sup>40</sup>. Alternative methods include  
182 submandibular or saphenous bleeding<sup>41,42</sup> which, in contrast to tail vein bleeding, do not require the  
183 use of a mouse restrainer and will preserve the tail vein for drug administration. Although tail vein  
184 blood sampling has previously been optimised for disease monitoring, ctDNA assays were limited to  
185 PCR-based experiments from plasma<sup>43</sup>. In contrast, sWGS of DBS can be used to simultaneously  
186 assay ctDNA features and the copy number landscape of engrafted tumours. We show that mouse-  
187 and human-specific reads recapitulated the fragment size properties of human cfDNA and ctDNA,  
188 respectively, indicating that mechanisms of cfDNA/ctDNA release into the blood stream is similar in  
189 mice and humans. Our approach is therefore a promising platform to study factors influencing ctDNA  
190 shedding, as well as other biochemical features of ctDNA, such as methylation and nucleosome  
191 profiles.

192           In the clinic, DBS-based technologies may allow self-collection at home (via a simple finger-  
193 prick), obviating the need for additional phlebotomy or hospital visits, and thus improving test  
194 acceptability and study participation. While our approach proved to be highly sensitive for the  
195 detection and quantification of disease in PDX mice, it relied on the ability to identify tumour-specific  
196 (human) ctDNA reads from DBS sequencing data using species-specific read alignment. This will not  
197 be possible in DBS samples collected from cancer patients. However, similar sensitivities might be  
198 achieved by implementing fragmentomic<sup>15,18</sup> or epigenomic features<sup>34</sup> and patient-specific mutations  
199 (personalised sequencing panels)<sup>10,11,35-37</sup> for ctDNA detection, facilitating sensitive disease  
200 monitoring from small blood volumes in the clinic<sup>17</sup>.

201           In summary, we reported the unprecedented use of WGS of ctDNA in murine models, which  
202 provides a powerful new tool for pre-clinical disease monitoring and allows accurate assessment of  
203 treatment response and simultaneous assaying of the copy number landscape over time. This  
204 provides an exciting opportunity for future research to study copy number driven tumour evolution and  
205 to investigate how treatment-induced selection of copy number changes may result in treatment

206 resistance. Importantly, the use of DBS-based ctDNA assays provides an important opportunity to  
207 simplify and improve study design in both mice and patients.

208

## 209 **Methods**

### 210 ***Generation of PDX mouse models***

211 Solid tumour samples were obtained from patients enrolled in the OV04 study (CTCROV04) at  
212 Addenbrooke's Hospital, Cambridge. Tumour samples were processed following standardised  
213 operating protocols as outlined in the OV04 study design and as previously described<sup>30</sup> before  
214 surgically engrafting into female NOD.Cg-Prkdc<sup>scid</sup> Il2rg<sup>tm1Wjl</sup>/SzJ (NSG) mice obtained from Charles  
215 River Laboratories. All mouse work conducted was approved and performed within the guidelines of  
216 the Home Office UK and the CRUK CI Animal Welfare and Ethics Review Board. Xenograft tissue  
217 processing and PDX passaging were performed as previously described<sup>30</sup>. In short, xenografting was  
218 performed either by subcutaneous surgical implantation (for first generation PDX mice) or  
219 subcutaneous injection of tumour cells from dissociated tumour tissues (for later PDX generations).  
220 Tumour bearing mice that reached their endpoint (tumour volumes of no more than 1500mm<sup>3</sup>) were  
221 culled via cervical dislocation or CO<sub>2</sub> overexposure. Tumour tissues were dissected, processed as  
222 described above and re-transplanted for expansion in serial generations for PDX biobank  
223 maintenance and model generation.

224

### 225 ***Treatment of mice***

226 Treatment was initiated when engrafted tumours reached a size of approximately 500mm<sup>3</sup>. Mice were  
227 randomised to either receive 50mg/kg of carboplatin (dissolved in water for injections (WFI) and  
228 mannitol (10mg/ul)), or 100µl carboplatin vehicle/control (10mg/ml of WFI diluted mannitol).  
229 Mice were treated by tail vein injection on day 1 and day 8 and monitored until they reached their  
230 endpoint of 1500mm<sup>3</sup> tumour volume, or if another health concern was raised.

231

### 232 ***Measurement of tumour volume***

233 Using callipers, the height (*h*), width (*w*) and depth (*d*) of the mouse tumours were measured in  
234 millimetres once a week and the tumour volume (mm<sup>3</sup>) was determined using the formula:

$$\text{Tumour Volume} = \frac{1}{6}\pi \times hwd$$



235

236 **PDX tumour growth curve modelling**

237 Heteroscedastic point-wise random intercept linear mixed models were used to model the tumour  
238 growth (on the cube root scale) of both, control and treated mice for each of the four patients included  
239 in this study. Heteroscedastic models were preferred as the (tumour growth) variance of treated mice  
240 appeared larger than the variance observed in the control mice.

241 For carboplatin treated mice within each patient group, the time points of the following two inflection  
242 points were determined by minimising the residual sum of squares (defined as the observed values  
243 minus the population expectation at a given time point) on the transformed scale:

244 ☐  $t_1$  = first inflection point: time point at which a treatment-induced change in tumour growth can  
245 be observed for an average mouse of a given patient line, and

246 ☐  $t_2$  = second inflection point: time point at which a second (revertant) change in tumour growth  
247 (due to the end of treatment) could be observed for an average mouse of a given patient line,  
248 where 0 corresponds to the day of start of treatment for each PDX mouse.

249 Different model checks were performed to ensure that the selected model for each patient showed  
250 homoscedastic and normally distributed random effect predictions and residuals. Since no obvious  
251 violation of the model assumptions were noted, chosen models were taken forward and statistical  
252 inference results (p-values) trusted. P-values were subjected to multiplicity correction adjustments for  
253 within-patient analyses and comparisons.

254

255 ***Collection and processing of dried blood spots***

256 Blood spots were collected on day 1 (immediately before treatment start), 16 and 29 for PDX mice.  
257 Mice were immobilized in a stretcher/restrainer before ticking the tail with a needle. Upon squeezing  
258 the tail, ~50 $\mu$ l of blood were collected using a capillary lined with EDTA. The capillary was emptied  
259 into a 1.5ml microfuge tube and the blood was spotted onto Whatman FTA™ Classic Cards (Merck),  
260 and left to air dry for at least 15 minutes before storing at room temperature. For control experiments,  
261 blood spot samples were also collected from non-tumour bearing (healthy) NSG mice during terminal  
262 bleeds via cardiac puncture. Terminal bleeds were performed using syringes lined with EDTA, and  
263 50 $\mu$ l of collected blood were subsequently spotted onto Whatman FTA™ Classic Cards. Again, cards  
264 were left to dry for 15 minutes.

265 In addition, dried blood spot samples were derived from 5 independent HGSOC patients (for use in  
266 dilution experiment; see **Supplementary Table 2** for patient information) by applying ~50µl of blood  
267 collected in K2-EDTA tubes to Whatman FTA™ Classic Cards.

268

### 269 ***Shallow Whole Genome Sequencing (sWGS)***

#### 270 1. Fresh frozen tumour tissue samples

271 Fresh frozen tissue pieces were homogenised using Soft tissue homogenizing CK14 tubes  
272 containing 1.4 mm ceramic beads (Bertin) on the Precellys tissue homogenizer instrument (Bertin).  
273 Lysates were subjected to DNA extraction using the AllPrep DNA/RNA Mini Kit (Qiagen) following  
274 manufacturer's recommendations, and DNA was sheared to a fragment length of 200bp using the  
275 Covaris LE220 (120 sec at room temperature; 30% duty factor; 180W peak incident power; 50 cycles  
276 per burst).

277 Using the SMARTer ThruPLEX DNA-seq kit (Takara), 50ng of sheared DNA were prepared for  
278 sequencing following the recommended instructions with samples undergoing 5 PCR cycles for  
279 unique sample indexing and library amplification. Subsequently, AMPure XP beads were used  
280 (following manufacturer's recommendations) to clean prepared libraries, which were then quantified  
281 and quality-checked using the Agilent 4200 TapeStation System (G2991AA). Pooled libraries were  
282 sequenced at low coverage on the HiSeq 4000 with single 50bp reads, at the CRUK CI Genomic  
283 Core Facility. Sequencing reads were aligned to the 1000 Genomes Project GRCh37-derived  
284 reference genome using the 'BWA' aligner (v.0.07.17) with default parameters.

#### 285 2. Dried blood spot samples

286 DNA from dried blood spots was extracted using the Qiagen Investigator kit (Qiagen) as  
287 previously described<sup>26</sup> and eluted in 50µl elution buffer. High molecular weight genomic DNA (gDNA)  
288 was removed using right-side size selection with AMPure XP beads at a 1:1 and 7:1 bead:sample  
289 ratio (Beckman Coulter) described previously<sup>26</sup>, and eluted in 25µl water.

290 Before undergoing ThruPLEX Tag-seq library preparation (Takara), samples were  
291 concentrated to 10µl using a vacuum concentrator (SpeedVac). Samples were amplified for 14 to 16  
292 cycles before undergoing the recommended bead clean up to remove remaining adapters. Quality  
293 control for library generation and quantification was done using a TapeStation (Agilent) before

294 samples were submitted for sequencing on a NovaSeq 6000 SP (Illumina, paired-end 150bp), at the  
295 CRUK CI Genomic Core Facility.

### 296 ***Analysis of dried blood spot sequencing data***

297 Blood spot sequencing data was aligned to the human (hg19) and mouse genome (mm10) using  
298 Xenomapper<sup>27</sup>. Reads overlapping with blacklisted regions for both human and mouse genomes  
299 were removed using the bedtools intersect function. Using Picard CollectInsertSizeMetrics, insert  
300 sizes were determined for the specific output files for each species. We computed a human ratio, that  
301 we call xenograft Tumour Fraction (xTF), for each sample by taking the total number of human reads  
302 >30bp fragment length and divided it by all reads (mouse and human) >30bp fragment length.  
303 Fragments below 30bp fragment length were excluded from the analysis as they tended to be noisy.

304

### 305 ***Dilution series***

306 To test the sensitivity and specificity of the human ratio metric, an *in silico* dilution experiment was  
307 performed using dried blood spot sequencing reads from five independent OV04 HGSOC patients  
308 (i.e. human reads only) and a healthy (non-tumour bearing) NSG mouse (i.e. mouse reads only).  
309 First, fastq files were aligned to the human (hg19) and mouse (mm10) reference genomes,  
310 respectively, to account for differences in sample quality, and to remove unmappable and duplicate  
311 reads. Resulting bam files were converted back to paired-end fastq files using the bedtools  
312 bamToFastq conversion utility. Mouse and human fastq files were then downsampled and merged to  
313 generate a seven-point dilution series containing 1%, 2%, 5%, 7%, 10%, 15% and 25% of human  
314 reads diluted in mouse reads for each of the 5 OV04 patients (35 samples in total). Paired-end fastq  
315 file pairs were then analysed with the Xenomapper pipeline, and human ratios (xTFs) estimated as  
316 described above. Estimated xTFs were then compared to expected human ratios based on *in silico*  
317 dilution mixtures.

318

### 319 ***Absolute copy number analyses***

320 We used the QDNAseq R package<sup>29</sup> (v1.24.0) to count reads within 30 and 500kb bins, followed by  
321 read count correction for sequence mappability and GC content, and copy number  
322 segmentation. Resulting relative copy number data was then subjected to downstream analyses using  
323 the Rascal R package<sup>30</sup> for ploidy and cellularity estimation and absolute copy number fitting as

324 previously described<sup>30</sup>. For dried blood spot (DBS) samples, ploidy information from fitted tumour  
325 tissue samples from the same patient line were used to guide accurate ACN fitting. Note that DBS  
326 samples from healthy (non-tumour bearing) mice were automatically fitted to diploid ACN fits due to  
327 the absence of tumour reads and detectable somatic copy number aberrations (SCNAs).  
328 Following ploidy and cellularity estimation, absolute copy number (ACN) profiles were generated for  
329 tumour tissues and DBS samples and subsequently correlated/compared across each 500kb bin.  
330 Putative driver amplifications were detected and identified using the Catalogue Of Somatic Mutations  
331 In Cancer (COSMIC; <https://cancer.sanger.ac.uk/cosmic/help/cnv/overview>) definitions and thresholds  
332 for high level amplifications and homozygous deletions: Gain: average genome ploidy  $\leq 2.7$  and total  
333 copy number  $\geq 5$ ; or average genome ploidy  $> 2.7$  and total copy number  $\geq 9$ . Loss: average genome  
334 ploidy  $\leq 2.7$  and total copy number = 0; or average genome ploidy  $> 2.7$  and total copy number  $<$   
335 (average genome ploidy - 2.7). Copy number signatures, as shown in **Supplementary Fig. 4**, were  
336 estimated as previously described<sup>31</sup>.

337

#### 338 ***Tagged-Amplicon Sequencing (TAm-Seq)***

339 Small indels and single nucleotide variants were assessed across the coding regions of *TP53*,  
340 *BRCA1*, *BRCA2*, *MLH1*, *MSH2*, *MSH6*, *NF1*, *PMS2*, *PTEN*, *RAD51B*, *RAD51C*, *RAD51D*, and  
341 mutation hot spot regions for *BRAF*, *EGFR*, *KRAS*, and *PIK3CA* using the Tagged-Amplicon deep  
342 sequencing technology as previously reported<sup>44</sup>. Briefly, libraries were prepared in 48.48 Juno Access  
343 Array Integrated Fluidic Circuits chips (Fluidigm, PN 101-1926) on the IFC Controller AX instrument  
344 (Fluidigm), and libraries were sequenced by the CRUK CI Genomics Core Facility using 150bp  
345 paired-end mode on either the NovaSeq 6000 (SP flowcell) or HiSeq 4000 system. Reads were  
346 aligned to the GRCh37 reference genome using the 'BWA-MEM' aligner and variant calling was  
347 performed as previously described<sup>45</sup>.

348

#### 349 ***Haematoxylin and Eosin (H&E) and immunohistochemical p53 staining***

350 H&E and immunohistochemical staining of p53 were carried out but the CRUK CI Histopathology  
351 Core Facility. H&E sections were stained following the Harris H&E staining protocol using a multi-  
352 stainer instrument (Leica ST5020). p53 staining was performed on 3 $\mu$ m FFPE sections using the

353 Leica Bond Max fully automated IHC system. Antigen retrieval was performed using sodium citrate for  
354 30 mins, and p53 was stained using the D07 Dako p53 antibody (1:1000).

355 ***Data and code availability***

356 Raw sequencing data from DBS samples will be uploaded to the European Genome-phenome  
357 Archive (EGA) database prior to publication. All supplementary data and all code required to  
358 reproduce the analyses and figures presented in this manuscript will be deposited on the Biostudies  
359 database.

360

361 **Other**

362 ***Acknowledgements***

363 We would like to thank all patients who participated in and donated samples to this study. We thank  
364 Gemma Cronshaw and the biological resource unit (BRU) of the Cancer Research UK Cambridge  
365 Institute for their support with the animal models and performing weekly tumour measurement. We  
366 would like to thank the Cancer Research UK Cambridge Institute Genomics, IT & Scientific  
367 Computing and Histopathology core facilities for their support with various aspects of this work.

368 We also thank the Cancer Molecular Diagnostics Laboratory/Blood Processing Laboratory, which is  
369 supported by Cambridge NIHR Biomedical Research Centre, Cambridge Cancer Centre and the Mark  
370 Foundation of Cancer Research, who have performed blood collection, ctDNA isolation and  
371 bioinformatics analysis on the ovarian cancer patients. We acknowledge funding and support from  
372 Cancer Research UK, and the Cancer Research UK Cambridge Centre.

373

374 ***Author Contributions***

375 Conceptualization, C.M.S., K. Heider, N.R. and J.D.B.; Methodology, C.M.S., K.Heider,  
376 S.E.B., J.A.H., A.V. and M.V.; Software, C.M.S., K.Heider, and A.V.; Validation, C.M.S. and K.Heider;  
377 Formal Analysis, C.M.S., K.Heider, A.V. and D.L.C.; Investigation, C.M.S., K. Heider, J.B., S.E.B.,  
378 J.A.H., A.A. and M.V.; Resources, C.M.S., K. Heider, J.B., J.A.H., S.E.B., A.A., A.V., D.L.C. and M.V.;  
379 Data Curation, C.M.S., K. Heider, J.B., and A.V.; Clinical Data, M.A.V.R. and K.Hosking; Writing -  
380 Original Draft, C.M.S., K. Heider, N.R. and J.D.B.; Writing - Review & Editing, C.M.S., K. Heider,  
381 D.L.C., A.A., M.A.V.R., M.V., N.R. and J.D.B.; Visualisation, C.M.S. and K. Heider; Supervision,  
382 C.M.S., K. Heider, M.V., N.R. and J.D.B.; Project Administration, C.M.S., K. Heider, M.V., N.R. and  
383 J.D.B.; Funding Acquisition, C.M.S., K.Heider, N.R. and J.D.B.

384

385 ***Competing Financial Interests***

386 Several of the authors are inventors and contributors on patents relating to methods for ctDNA  
387 analysis including methods described and used in this study. N.R. is an officer of Inivata Ltd. which  
388 commercialises ctDNA assays. J.D.B. is a founder of Tailor Bio. Both, Inivata and Tailor Bio, had no  
389 role in the conceptualization or design of the pre-clinical study, statistical analysis or decision to  
390 publish the manuscript.

391           **References**

- 392    1.    Deveson, I. W. *et al.* Evaluating the analytical validity of circulating tumor DNA sequencing  
393           assays for precision oncology. *Nat. Biotechnol.* **39**, (2021).
- 394    2.    Kilgour, E., Rothwell, D. G., Brady, G. & Dive, C. Liquid Biopsy-Based Biomarkers of  
395           Treatment Response and Resistance. *Cancer Cell* **37**, 485–495 (2020).
- 396    3.    Heitzer, E., Haque, I. S., Roberts, C. E. S. & Speicher, M. R. Current and future perspectives  
397           of liquid biopsies in genomics-driven oncology. *Nat. Rev. Genet.* **20**, 71–88 (2019).
- 398    4.    Rothwell, D. G. *et al.* Utility of ctDNA to support patient selection for early phase clinical trials:  
399           the TARGET study. *Nat. Med.* **25**, 738–743 (2019).
- 400    5.    Cohen, J. D. *et al.* Detection and localization of surgically resectable cancers with a multi-  
401           analyte blood test. *Science (80-. )*. **359**, 926–930 (2018).
- 402    6.    Wan, J. C. M. *et al.* Liquid biopsies come of age: Towards implementation of circulating tumour  
403           DNA. *Nat. Rev. Cancer* **17**, 223–238 (2017).
- 404    7.    Cescon, D. W., Bratman, S. V., Chan, S. M. & Siu, L. L. Circulating tumor DNA and liquid  
405           biopsy in oncology. *Nat. Cancer* **1**, 276–290 (2020).
- 406    8.    Rolfo, C. *et al.* Liquid Biopsy for Advanced NSCLC: A Consensus Statement From the  
407           International Association for the Study of Lung Cancer. *J. Thorac. Oncol.* **16**, 1647–1662  
408           (2021).
- 409    9.    Paracchini, L. *et al.* Genome-wide copy-number alterations in circulating tumor DNA as a novel  
410           biomarker for patients with high-grade serous ovarian cancer. *Clin. Cancer Res.* **27**, 2549–  
411           2560 (2021).
- 412    10.   Wan, J. C. M. *et al.* ctDNA monitoring using patient-specific sequencing and integration of  
413           variant reads. *Sci. Transl. Med.* **12**, 1–17 (2020).
- 414    11.   Zviran, A. *et al.* Genome-wide cell-free DNA mutational integration enables ultra-sensitive  
415           cancer monitoring. *Nat. Med.* **26**, 1114–1124 (2020).
- 416    12.   Abbosh, C. & Swanton, C. ctDNA: An emerging neoadjuvant biomarker in resectable solid  
417           tumors. *PLOS Med.* **18**, e1003771 (2021).
- 418    13.   Chen, M. & Zhao, H. Next-generation sequencing in liquid biopsy: cancer screening and early  
419           detection. *Hum. Genomics* **13**, 34 (2019).
- 420    14.   Adalsteinsson, V. A. *et al.* Scalable whole-exome sequencing of cell-free DNA reveals high

- 421 concordance with metastatic tumors. *Nat. Commun.* **8**, (2017).
- 422 15. Mouliere, F. *et al.* Enhanced detection of circulating tumor DNA by fragment size analysis. *Sci.*  
423 *Transl. Med.* **10**, 1–14 (2018).
- 424 16. Ulz, P. *et al.* Inference of transcription factor binding from cell-free DNA enables tumor subtype  
425 prediction and early detection. *Nat. Commun.* **10**, (2019).
- 426 17. Keller, L., Belloum, Y., Wikman, H. & Pantel, K. Clinical relevance of blood-based ctDNA  
427 analysis: mutation detection and beyond. *Br. J. Cancer* **124**, 345–358 (2021).
- 428 18. Cristiano, S. *et al.* Genome-wide cell-free DNA fragmentation in patients with cancer. *Nature*  
429 **570**, 385–389 (2019).
- 430 19. Markus, H. *et al.* Refined characterization of circulating tumor DNA through biological feature  
431 integration. *medRxiv* 1–13 (2021) doi:<https://doi.org/10.1101/2021.08.11.21261907>.
- 432 20. Ireson, C. R., Alavijeh, M. S., Palmer, A. M., Fowler, E. R. & Jones, H. J. The role of mouse  
433 tumour models in the discovery and development of anticancer drugs. *Br. J. Cancer* **121**, 101–  
434 108 (2019).
- 435 21. Williams, J. A. Using pdx for preclinical cancer drug discovery: The evolving field. *J. Clin. Med.*  
436 **7**, (2018).
- 437 22. Pearson, A. T. *et al.* Patient-derived xenograft (PDX) tumors increase growth rate with time.  
438 *Oncotarget* **7**, 7993–8005 (2016).
- 439 23. Ice, R. J. *et al.* Drug responses are conserved across patient-derived xenograft models of  
440 melanoma leading to identification of novel drug combination therapies. *Br. J. Cancer* **122**,  
441 648–657 (2019).
- 442 24. Koessinger, A. L. *et al.* Quantitative in vivo bioluminescence imaging of orthotopic patient-  
443 derived glioblastoma xenografts. *Sci. Rep.* **10**, 1–10 (2020).
- 444 25. Weissleder, R. Scaling down imaging: Molecular mapping of cancer in mice. *Nat. Rev. Cancer*  
445 **2**, 11–18 (2002).
- 446 26. Heider, K. *et al.* Detection of ctDNA from Dried Blood Spots after DNA Size Selection. *Clin.*  
447 *Chem.* **66**, 697–705 (2020).
- 448 27. Wakefield, M. J. Xenomapper: Mapping reads in a mixed species context. *J. Open Source*  
449 *Softw.* **1**, 18 (2016).
- 450 28. Jahr, S. *et al.* DNA fragments in the blood plasma of cancer patients: Quantitations and



- 451 evidence for their origin from apoptotic and necrotic cells. *Cancer Res.* **61**, 1659–1665 (2001).
- 452 29. Scheinin, I. *et al.* DNA copy number analysis of fresh and formalin-fixed specimens by shallow  
453 whole-genome sequencing with identification and exclusion of problematic regions in the  
454 genome assembly. *Genome Res.* **24**, 2022–2032 (2014).
- 455 30. Sauer, C. M. *et al.* Absolute copy number fitting from shallow whole genome sequencing data.  
456 *bioRxiv* 2021.07.19.452658 (2021).
- 457 31. Macintyre, G. *et al.* Copy number signatures and mutational processes in ovarian carcinoma.  
458 *Nat. Genet.* **50**, 1262–1270 (2018).
- 459 32. O’Leary, B. *et al.* Early circulating tumor DNA dynamics and clonal selection with palbociclib  
460 and fulvestrant for breast cancer. *Nat. Commun.* **9**, 1–10 (2018).
- 461 33. Chaisomchit, S., Wichajarn, R., Janejai, N. & Chareonsirawatana, W. Stability of genomic DNA  
462 in dried blood spots stored on filter paper. *Southeast Asian J. Trop. Med. Public Health* **36**,  
463 270–273 (2005).
- 464 34. Lehmann-Werman, R. *et al.* Identification of tissue-specific cell death using methylation  
465 patterns of circulating DNA. *Proc. Natl. Acad. Sci. U. S. A.* **113**, E1826–E1834 (2016).
- 466 35. Kurtz, D. M. *et al.* Enhanced detection of minimal residual disease by targeted sequencing of  
467 phased variants in circulating tumor DNA. *Nat. Biotechnol.* (2021) doi:10.1038/s41587-021-  
468 00981-w.
- 469 36. Abbosh, C. *et al.* Phylogenetic ctDNA analysis depicts early-stage lung cancer evolution.  
470 *Nature* **545**, 446–451 (2017).
- 471 37. Parsons, H. A. *et al.* Sensitive Detection of Minimal Residual Disease in Patients Treated for  
472 Early-Stage Breast Cancer. *Clin. Cancer Res.* **26**, 2556–2564 (2020).
- 473 38. Wickremsinhe, E. R. & Perkins, E. J. Using dried blood spot sampling to improve data quality  
474 and reduce animal use in mouse pharmacokinetic studies. *J. Am. Assoc. Lab. Anim. Sci.* **54**,  
475 139–144 (2015).
- 476 39. Prescott, M. J. & Lidster, K. Improving quality of science through better animal welfare: The  
477 NC3Rs strategy. *Lab Anim. (NY)*. **46**, 152–156 (2017).
- 478 40. Durschlag, M., Wurbel, H., Stauffacher, M. & Von Holst, D. Repeated blood collection in the  
479 laboratory mouse by tail incision - Modification of an old technique. *Physiol. Behav.* **60**, 1565–  
480 1567 (1996).

- 481 41. Golde, W. T., Gollobin, P. & Rodriguez, L. L. A rapid, simple, and humane method for  
482 submandibular bleeding of mice using a lancet. *Lab Anim. (NY)*. **34**, 39–43 (2005).
- 483 42. Abatan, O. I., Welch, K. B. & Nemzek, J. A. Evaluation of saphenous venipuncture and  
484 modified tail-clip blood collection in mice. *J. Am. Assoc. Lab. Anim. Sci.* **47**, 8–15 (2008).
- 485 43. Rago, C. *et al.* Serial assessment of human tumor burdens in mice by the analysis of  
486 circulating DNA. *Cancer Res.* **67**, 9364–9370 (2007).
- 487 44. Forshew, T. *et al.* Noninvasive identification and monitoring of cancer mutations by targeted  
488 deep sequencing of plasma DNA. *Sci. Transl. Med.* **4**, (2012).
- 489 45. Piskorz, A. M. *et al.* Methanol-based fixation is superior to buffered formalin for next-  
490 generation sequencing of DNA from clinical cancer samples. *Ann. Oncol.* **27**, 532–539 (2016).
- 491

492 **Main Figures**

493 **Figure 1 – The xTF metric is highly specific and sensitive to detect and quantify ctDNA**  
494 **from dried blood spots.**

495

496 (a) Workflow of the dried blood spot (DBS)-based xenograft Tumour Fraction (xTF). DBS are  
497 generated by collecting and depositing 50  $\mu$ l of blood from the tail vein of the mouse onto FTA filter  
498 cards. DNA is extracted from blood spots, processed and sequenced as described previously<sup>26</sup>.  
499 Human-specific reads and mouse-specific reads were separated into species-specific bam files using  
500 Xenomapper<sup>27</sup>. The xTF is then calculated by dividing the number of human specific reads by the total  
501 number of human and mouse specific reads in a given sample. (b) Comparison of xTF values  
502 obtained from healthy non-tumour bearing mice and PDX samples (Welch t-test,  $p < 2.2 \times 10^{-16}$ ).  
503 Sensitivity testing using the Mann–Whitney *U* Wilcoxon test (Wilcoxon test,  $p = 2.5 \times 10^{-7}$ ) showed  
504 similar results. (c) xTF dilution series. Dilution xTFs (0.01, 0.02, 0.05, 0.07, 0.1, 0.15 and 0.25) were  
505 computationally generated by mixing blood spot sequencing data obtained from five ovarian cancer  
506 patients and a healthy control mouse. The generated dilution series was analysed using Xenomapper  
507 and resulting xTF values were compared to the dilution xTFs (Spearman correlation  $R = 0.99$ ,  $p < 2.2$   
508  $\times 10^{-16}$ ). (d) Fragment length distributions of human- (pink) and mouse- (blue) specific reads from a  
509 DBS sample. Two vertical lines indicate 146 and 166 bp, the observed peaks for ctDNA and cfDNA,  
510 respectively. (e) Example of an absolute copy number (ACN) profile successfully generated from  
511 human-specific reads from a DBS collected from a PDX mouse of patient line 828. (f) Matching ACN  
512 profile generated from sWGS of PDX tumour tissue. **Supplementary Fig. 1 and 2** show  
513 representative ACN profiles for all four patient lines and the correlation of each copy number bin for  
514 the DBS and tissue sample pairs. (g) Correlation of Pearson correlation estimates (comparing ACN  
515 bins between tumour tissue and DBS) and xTFs from DBS samples (Spearman  $R = 0.64$ ,  $p < 2.2 \times 10^{-16}$ ).  
516

517 **Figure 2 – The DBS-based xTF allows longitudinal monitoring of disease progression**  
518 **and treatment response in pre-clinical studies.**  
519

520 (a) Pre-clinical PDX study overview. HGSOc patients underwent surgery and standard-of-care  
521 chemotherapy with carboplatin and paclitaxel. Disease progression was monitored over time using  
522 the CA-125 biomarker, CT scans, as well as ctDNA where available. The treatment-naïve surgical  
523 tumour or biopsy specimens were engrafted into NSG mice. Second or third generation PDX mice  
524 were then treated with either carboplatin or vehicle control via tail vein injection on day 1 and day 8.  
525 Tumour volumes were measured weekly, and blood spots were collected on day 1 (prior to treatment  
526 initiation), day 16 and 29. (b) xTF change from baseline during the first 29 days since treatment start  
527 for each PDX patient line. xTFs were normalised to baseline (day 1) xTF values for each mouse  
528 (dashed lines). Carboplatin-treated mice are shown in purple, control mice are shown in teal. Bold  
529 lines show the linear-model fitted line across all mice within the same treatment and patient group.  
530 Horizontal dashed lines at  $y=1$  indicate normalised baseline. (c) Fraction of blood spot samples in  
531 which putative driver amplifications were detected over time. The fraction of samples with detected  
532 gene amplifications decreases in carboplatin treated group, while increasing in the control group over  
533 time. (d) xTF values were correlated with tumour volumes of the nearest matched time-point for both  
534 untreated (Spearman  $R = 0.45$ ,  $p = 0.00018$ ), and carboplatin-treated (Spearman  $R = 0.056$ ,  $p = 0.78$ )  
535 PDX mice.

536 **Figure 3 – Change in xTF over time predicts disease outcome.**

537 (a-d) Weekly measured tumour volumes ( $\text{mm}^3$ ) for PDX mice over time. Treatment start is indicated  
538 by grey solid vertical line. Solid coloured lines show modelled tumour growth curves using  
539 heteroscedastic point-wise random intercept linear mixed models (**see Methods**). Growth curve  
540 inflection points were determined (**see Methods**) to estimate the start of treatment effect and tumour  
541 regrowth (dashed vertical purple lines labelled  $t_1$  and  $t_2$ , respectively). (e) The mean xTF slope was  
542 estimated for each treatment group across the four patient lines (**Fig. 2b**) and compared to the mean  
543 time to endpoint (Spearman  $R = -0.73$ ,  $p = 0.039$ ) and tumour regrowth (Spearman  $R = -0.97$ ,  $p =$   
544  $0.025$ ). The four different patient lines are indicated by different colours.

Figure 1

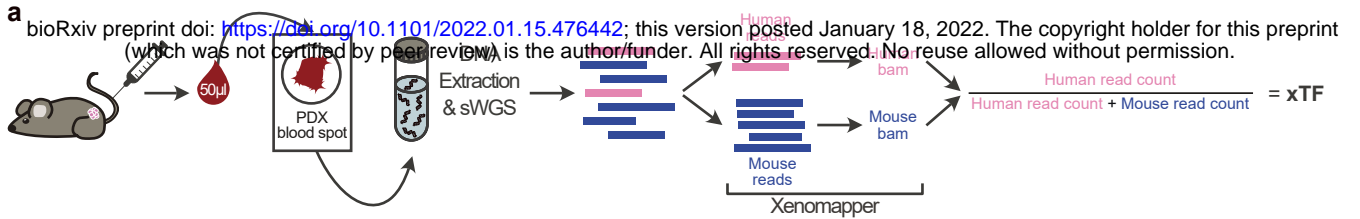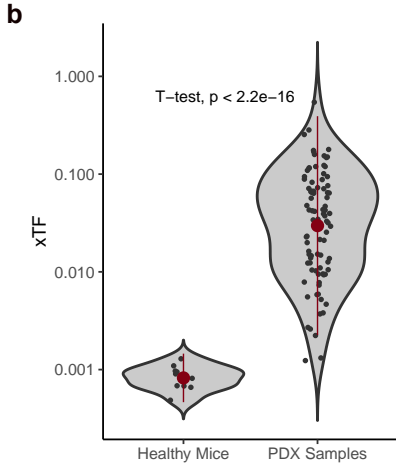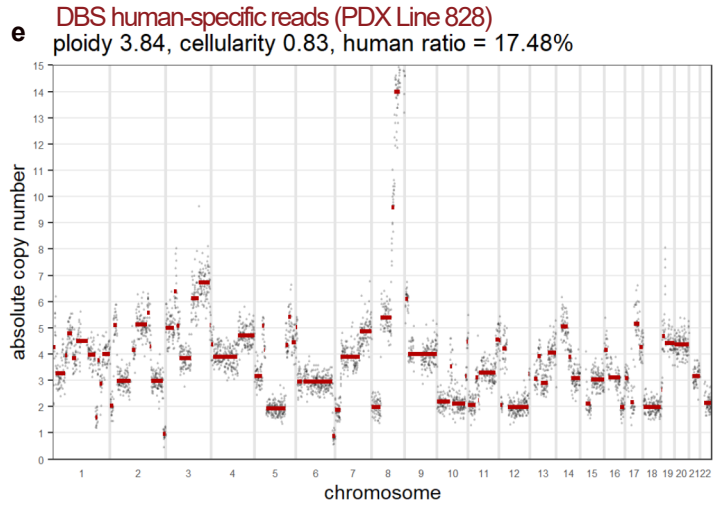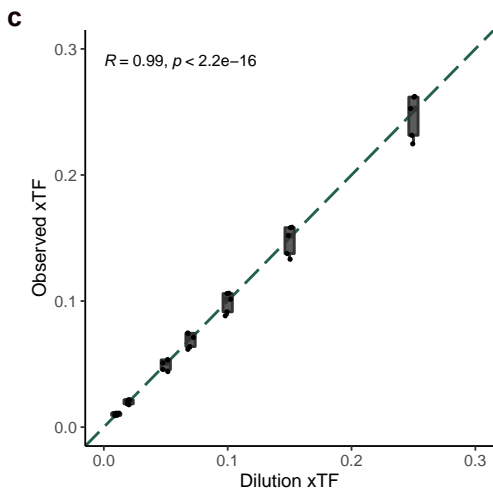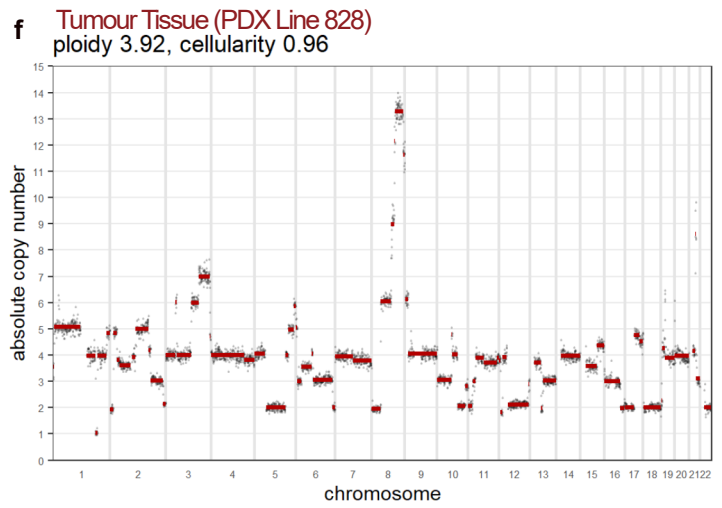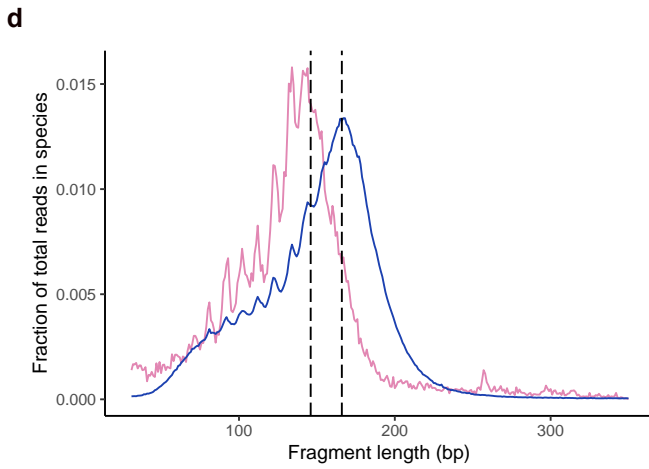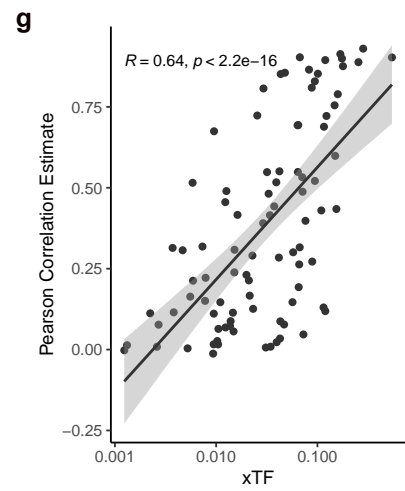

Figure 2

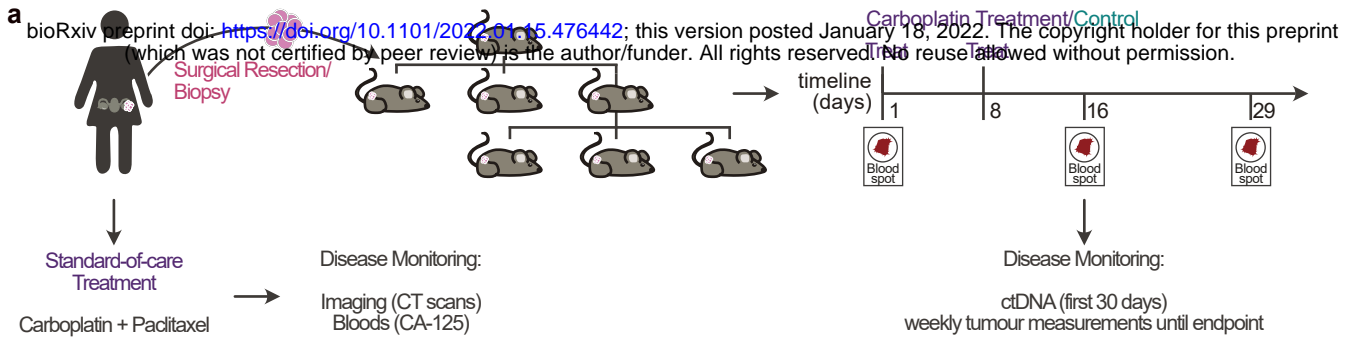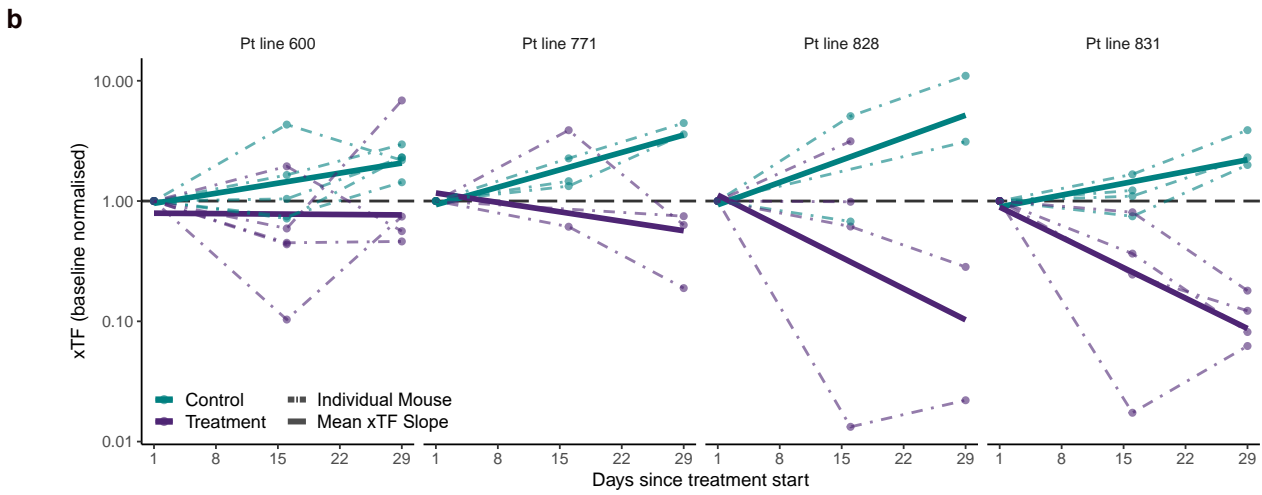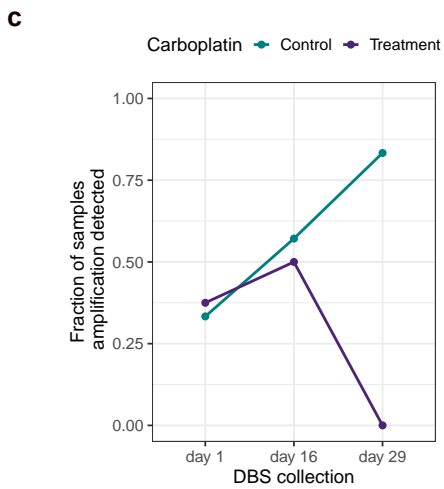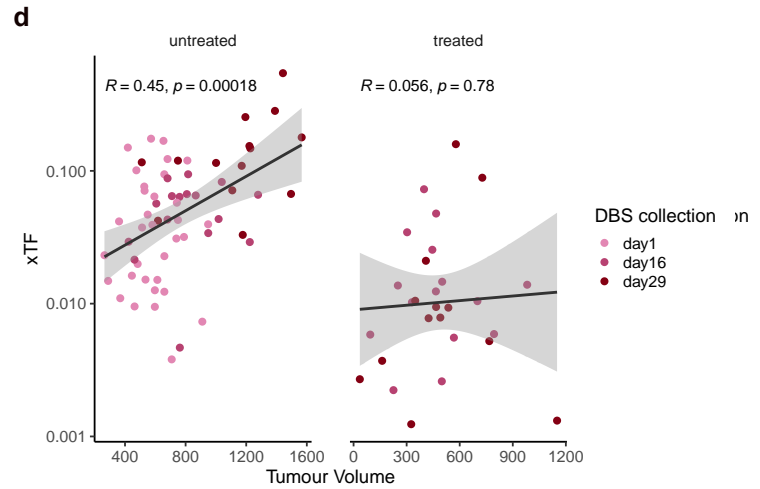

Figure 3

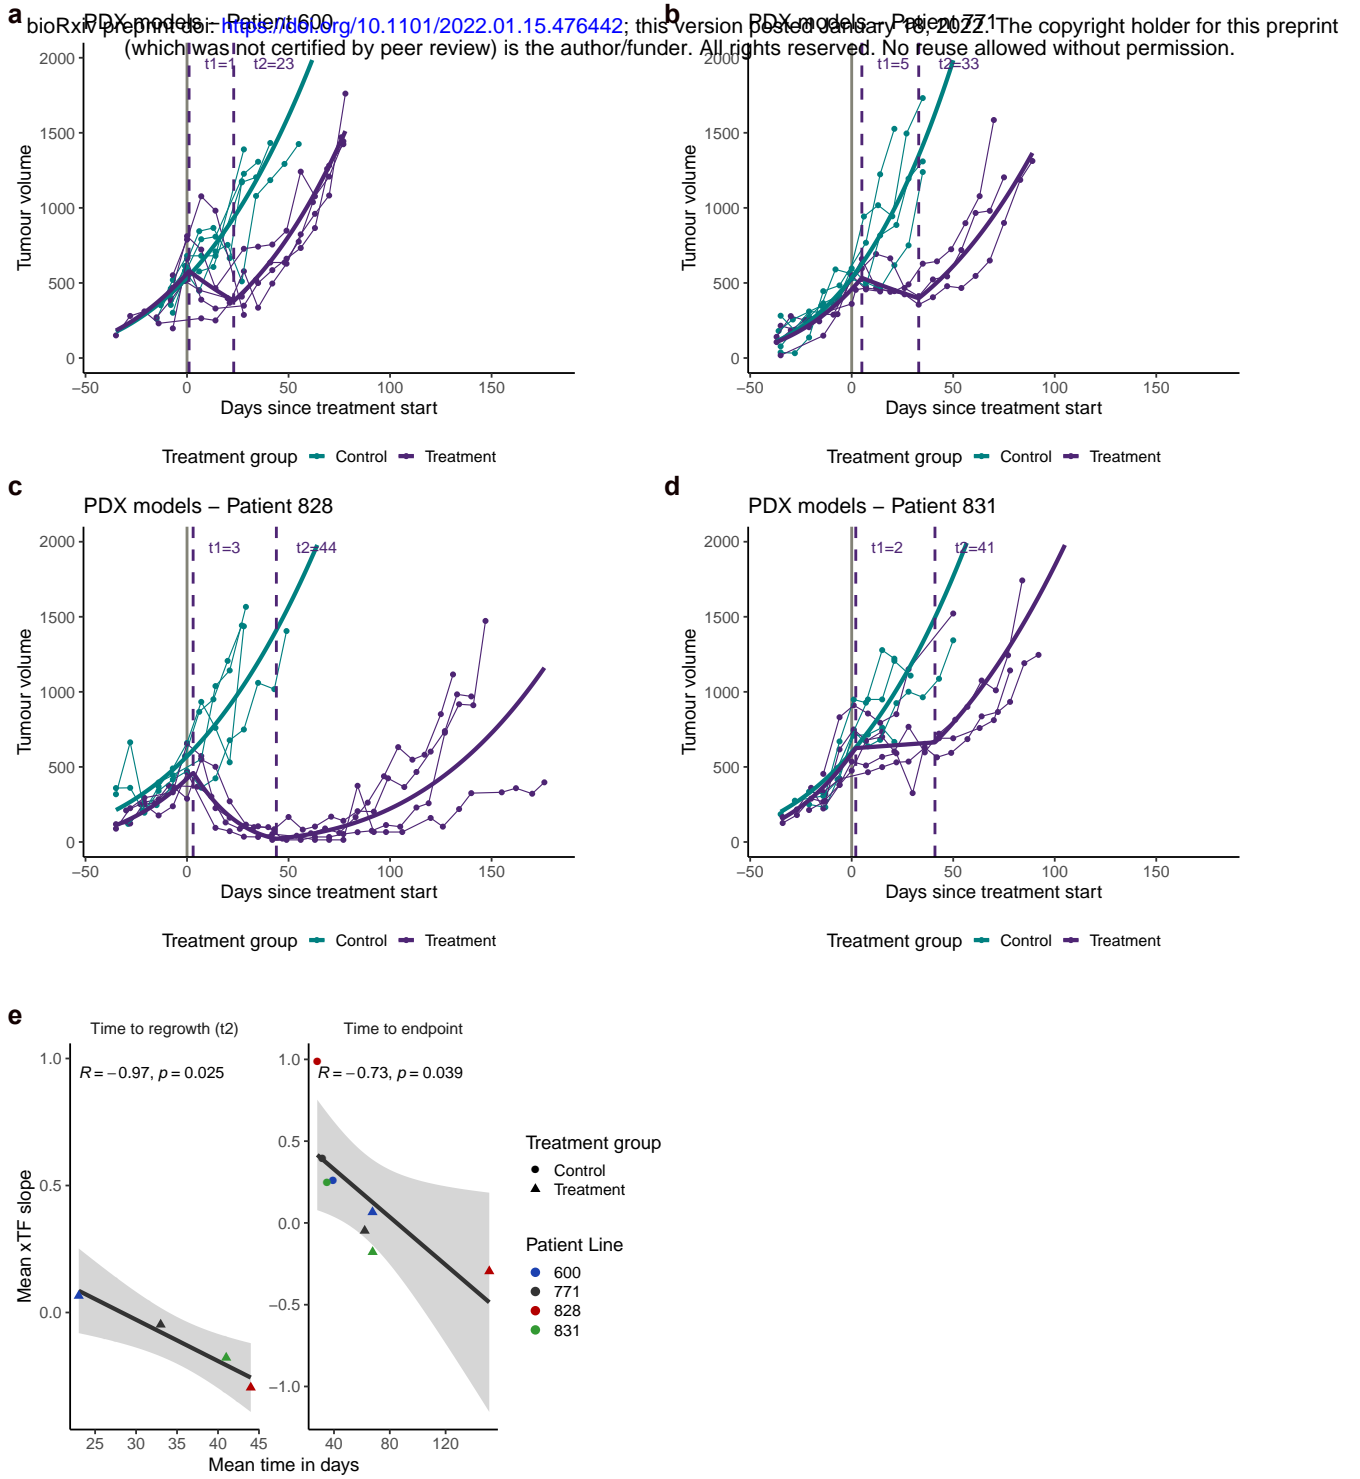

Source: https://www.biorxiv.org/content/10.1101/2022.01.15.476442v1.full.pdf
